# Supplementary material for: Graphene@Curcumin-Copper Paintable Coatings for the Prevention of Nosocomial Microbial Infection
Source: MDPI journal article supplement (doi:10.3390/molecules28062814), 2023-03-20
Supplement: s1 [file s1]

Article

# Graphene@Curcumin-Copper Paintable Coatings for the Prevention of Nosocomial Microbial Infection

Mohammad Oves <sup>1</sup>, Mohammad Omaish Ansari <sup>2</sup>, Mohammad Shah Nawaze Ansari <sup>2</sup>, and Adnan Memić <sup>2,\*</sup>

<sup>1</sup> Center of Excellence in Environmental Studies, King Abdulaziz University, Jeddah 21589, Saudi Arabia

<sup>2</sup> Center of Nanotechnology, King Abdulaziz University, Jeddah 21589, Saudi Arabia

\* Correspondence: amemic@kau.edu.sa; Tel.: +966-564975404

**Citation:** Oves, M.; Ansari, M.O.; Ansari, M.S.; Memić, A. Graphene@curcumin-copper paintable coatings for the prevention of nosocomial microbial infection. *Molecules* **2023**, *volume number*, *x*.  
<https://doi.org/10.3390/xxxxx>

Academic Editor(s):

Received: date

Revised: date

Accepted: date

Published: date

**Publisher's Note:** MDPI stays neutral with regard to jurisdictional claims in published maps and institutional affiliations.

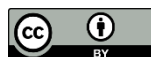

**Copyright:** © 2023 by the authors. Submitted for possible open access publication under the terms and conditions of the Creative Commons Attribution (CC BY) license (<https://creativecommons.org/licenses/by/4.0/>).

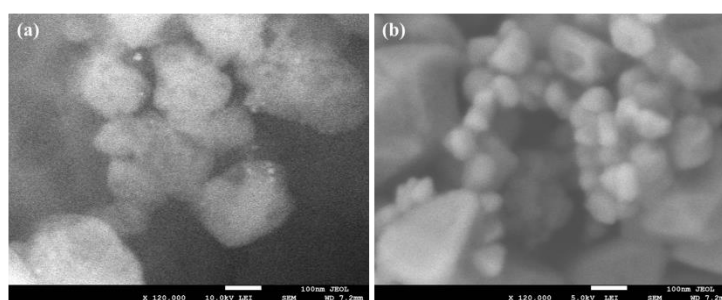

**Figure S1.** FESEM image of (a) CR and (b) Cu nanoparticles. Figure S1(a-b) shows high resolution FESEM images of CR and Cu. It is clearly evident from

Fig. S1(a) that the CR nanoparticles have fluffy structure with critical size nanopores on its surfaces. On the other hand, Cu nanoparticles have solid geometry showing polyhedral shapes [Fig. S1(b)]. Also, it seems that both the samples are highly uniform, dispersed and well separated with any lump or agglomeration.

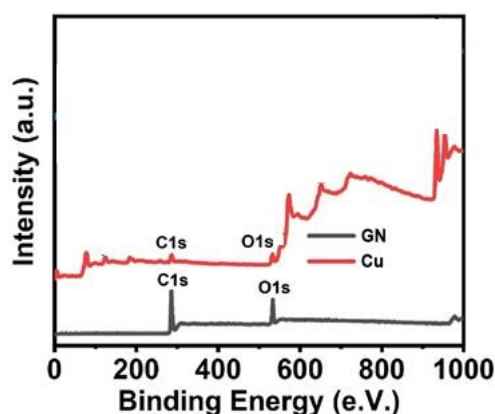

**Figure S2.** XPS survey scan of GN and Cu.

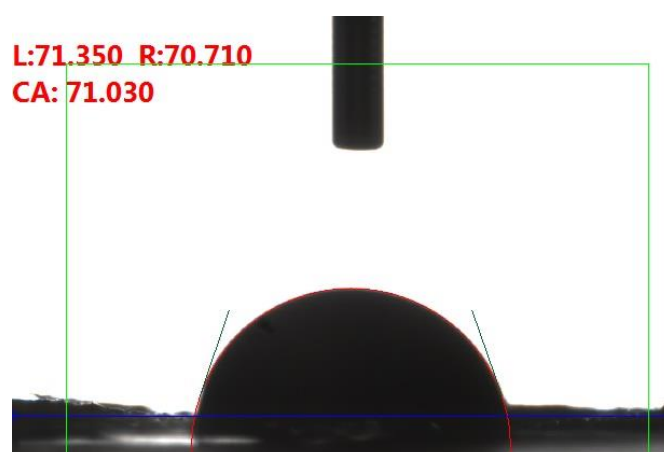

**Figure S3.** Water contact angle measurement of GN@CR-Cu composite.
